# Supplementary material for: Comprehensive Analysis of Differentially Expressed Long Noncoding RNA-mRNA in the Adenoma-Carcinoma Sequence of DNA Mismatch Repair Proficient Colon Cancer
Source: J Oncol. 2021 Jun 1;2021:9977695. doi: 10.1155/2021/9977695 (PMC8208869; doi:10.1155/2021/9977695)
Supplement: Supplementary Materials — Additional file 1. Quality control results of sample RNA. Additional file 2. Quality control results of microarrays. [file 9977695.f1.zip]

Archive with 2 entries (2 files):
- 9977695.f1/Additional file 1.docx
- 9977695.f1/Additional file 2.docx
